# Supplementary material for: Active surveillance for safety monitoring of seasonal influenza vaccines in Italy, 2015/2016 season
Source: PubMed Central journal article supplement (PMC6303938; doi:10.1186/s12889-018-6260-5), 2018-12-22
Supplement: 12889_2018_6260_MOESM1_ESM.pdf [file 12889_2018_6260_MOESM1_ESM.pdf]

**Sveva**  
**SURVEILLANCE OF EVENTS FOLLOWING SEASONAL INFLUENZA VACCINATION**  
**2015-2016 SEASON**

**SECTION 1: GENERAL INFORMATION**

Region \_\_\_\_\_ Centre \_\_\_\_\_ ID |\_|\_|\_|\_|\_|\_|\_|

Form completed by \_\_\_\_\_ Date \_\_\_\_\_

**DEMOGRAPHIC CHARACTERISTICS**

Surname \_\_\_\_\_ First name \_\_\_\_\_

Fiscal Code |\_|\_|\_|\_|\_|\_|\_|\_|\_|\_|\_|\_|\_|\_|\_|\_| Gender  M  F

Date of birth |\_|\_| |\_|\_| |\_|\_|\_|\_|\_| Place of birth \_\_\_\_\_

Nationality  Italian  Other (please specify) \_\_\_\_\_

Contact Nr \_\_\_\_\_ Preferred time to be contacted \_\_\_\_\_

Contact Nr of relatives/neighbors \_\_\_\_\_

If minor (under the age of 18 y):

Surname and first name of a parent:

\_\_\_\_\_

\_\_\_\_\_

Contact Nr \_\_\_\_\_ Preferred time to be contacted \_\_\_\_\_

**PERSONAL INFORMATION OF THE VACCINEE**

Relevant chronic diseases  Yes  No  
*If yes, please specify* \_\_\_\_\_

Allergies  Yes  No  
*If yes, please specify* \_\_\_\_\_

Use of drugs (within the last 3 months)  Yes  No  
*If yes, please specify* \_\_\_\_\_

Other vaccination (within the last 2 weeks)  Yes  No  
*If yes, please specify date of administration and type of vaccine* \_\_\_\_\_

Flu vaccination (previous season)  Yes  No

Was flu vaccination recommended to you because you are listed in a risk category?  Yes  No

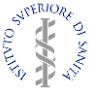

**SECTION 2: VACCINE ADMINISTRATION**

ID |\_|\_|\_|\_|\_|\_|\_|\_|

Form completed by \_\_\_\_\_ Date \_\_\_\_\_

**Administration of the first dose**

Contraindications to vaccination Yes  No

Date and route of vaccination |\_|\_| |\_|\_| |\_|\_|\_|\_|  deltoid  thigh  gluteus

Vaccine brand: \_\_\_\_\_

Lot # \_\_\_\_\_ Expiration date |\_|\_| |\_|\_| |\_|\_|\_|\_|

Administered by \_\_\_\_\_

First dose diary received Yes  No

Password delivered Yes  No

**Administration of the second dose**

Contraindications to vaccination Yes  No

Date and route of vaccination |\_|\_| |\_|\_| |\_|\_|\_|\_|  deltoid  thigh  gluteus

Vaccine brand: \_\_\_\_\_

Lot # \_\_\_\_\_ Expiration date |\_|\_| |\_|\_| |\_|\_|\_|\_|

Administered by \_\_\_\_\_

Second dose diary received Yes  No

Password delivered Yes  No

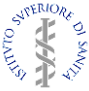

**SECTION 3: FOLLOW-UP AFTER 7 DAYS**

ID |\_|\_|\_|\_|\_|\_|\_|

Form completed by \_\_\_\_\_ Date \_\_\_\_\_

Vaccinee contacted? Yes  No

If vaccinee is lost to follow up, please specify the reason \_\_\_\_\_

If minor (under the age of 18 y):  Mother  Father  Other (please specify \_\_\_\_\_)

Administration  1° Dose  2° Dose

Vaccine brand \_\_\_\_\_ Date of administration |\_|\_| |\_|\_| |\_|\_|\_|\_|

Health status of vaccinee \_\_\_\_\_

**Diary information**

No events

|                          |                          | Day from administration                                                      |                          |                          |                          |                          |                          |                          |                          |                          |                          |
|--------------------------|--------------------------|------------------------------------------------------------------------------|--------------------------|--------------------------|--------------------------|--------------------------|--------------------------|--------------------------|--------------------------|--------------------------|--------------------------|
| YES                      | NO                       | Events                                                                       | 0                        | 1                        | 2                        | 3                        | 4                        | 5                        | 6                        |                          |                          |
| <input type="checkbox"/> | <input type="checkbox"/> | Local redness small <input type="checkbox"/> large <input type="checkbox"/>  | <input type="checkbox"/> | <input type="checkbox"/> | <input type="checkbox"/> | <input type="checkbox"/> | <input type="checkbox"/> | <input type="checkbox"/> | <input type="checkbox"/> | <input type="checkbox"/> | <input type="checkbox"/> |
| <input type="checkbox"/> | <input type="checkbox"/> | Local swelling small <input type="checkbox"/> large <input type="checkbox"/> | <input type="checkbox"/> | <input type="checkbox"/> | <input type="checkbox"/> | <input type="checkbox"/> | <input type="checkbox"/> | <input type="checkbox"/> | <input type="checkbox"/> | <input type="checkbox"/> | <input type="checkbox"/> |
| <input type="checkbox"/> | <input type="checkbox"/> | Local induration                                                             | <input type="checkbox"/> | <input type="checkbox"/> | <input type="checkbox"/> | <input type="checkbox"/> | <input type="checkbox"/> | <input type="checkbox"/> | <input type="checkbox"/> | <input type="checkbox"/> | <input type="checkbox"/> |
| <input type="checkbox"/> | <input type="checkbox"/> | Local pain                                                                   | <input type="checkbox"/> | <input type="checkbox"/> | <input type="checkbox"/> | <input type="checkbox"/> | <input type="checkbox"/> | <input type="checkbox"/> | <input type="checkbox"/> | <input type="checkbox"/> | <input type="checkbox"/> |
| <input type="checkbox"/> | <input type="checkbox"/> | Fever ≥ 37.5°C body temperature (highest)  _ _ _ ,  _ _                      | <input type="checkbox"/> | <input type="checkbox"/> | <input type="checkbox"/> | <input type="checkbox"/> | <input type="checkbox"/> | <input type="checkbox"/> | <input type="checkbox"/> | <input type="checkbox"/> | <input type="checkbox"/> |
| <input type="checkbox"/> | <input type="checkbox"/> | Loss of appetite                                                             | <input type="checkbox"/> | <input type="checkbox"/> | <input type="checkbox"/> | <input type="checkbox"/> | <input type="checkbox"/> | <input type="checkbox"/> | <input type="checkbox"/> | <input type="checkbox"/> | <input type="checkbox"/> |
| <input type="checkbox"/> | <input type="checkbox"/> | Febrile seizures                                                             | <input type="checkbox"/> | <input type="checkbox"/> | <input type="checkbox"/> | <input type="checkbox"/> | <input type="checkbox"/> | <input type="checkbox"/> | <input type="checkbox"/> | <input type="checkbox"/> | <input type="checkbox"/> |
| <input type="checkbox"/> | <input type="checkbox"/> | Headache                                                                     | <input type="checkbox"/> | <input type="checkbox"/> | <input type="checkbox"/> | <input type="checkbox"/> | <input type="checkbox"/> | <input type="checkbox"/> | <input type="checkbox"/> | <input type="checkbox"/> | <input type="checkbox"/> |
| <input type="checkbox"/> | <input type="checkbox"/> | Vomiting and nausea                                                          | <input type="checkbox"/> | <input type="checkbox"/> | <input type="checkbox"/> | <input type="checkbox"/> | <input type="checkbox"/> | <input type="checkbox"/> | <input type="checkbox"/> | <input type="checkbox"/> | <input type="checkbox"/> |
| <input type="checkbox"/> | <input type="checkbox"/> | Malaise                                                                      | <input type="checkbox"/> | <input type="checkbox"/> | <input type="checkbox"/> | <input type="checkbox"/> | <input type="checkbox"/> | <input type="checkbox"/> | <input type="checkbox"/> | <input type="checkbox"/> | <input type="checkbox"/> |
| <input type="checkbox"/> | <input type="checkbox"/> | Arthralgia                                                                   | <input type="checkbox"/> | <input type="checkbox"/> | <input type="checkbox"/> | <input type="checkbox"/> | <input type="checkbox"/> | <input type="checkbox"/> | <input type="checkbox"/> | <input type="checkbox"/> | <input type="checkbox"/> |
| <input type="checkbox"/> | <input type="checkbox"/> | Myalgia                                                                      | <input type="checkbox"/> | <input type="checkbox"/> | <input type="checkbox"/> | <input type="checkbox"/> | <input type="checkbox"/> | <input type="checkbox"/> | <input type="checkbox"/> | <input type="checkbox"/> | <input type="checkbox"/> |
| <input type="checkbox"/> | <input type="checkbox"/> | Dyspnoea, asthma, bronchospasm                                               | <input type="checkbox"/> | <input type="checkbox"/> | <input type="checkbox"/> | <input type="checkbox"/> | <input type="checkbox"/> | <input type="checkbox"/> | <input type="checkbox"/> | <input type="checkbox"/> | <input type="checkbox"/> |
| <input type="checkbox"/> | <input type="checkbox"/> | Rash                                                                         | <input type="checkbox"/> | <input type="checkbox"/> | <input type="checkbox"/> | <input type="checkbox"/> | <input type="checkbox"/> | <input type="checkbox"/> | <input type="checkbox"/> | <input type="checkbox"/> | <input type="checkbox"/> |
| <input type="checkbox"/> | <input type="checkbox"/> | Generalized itching                                                          | <input type="checkbox"/> | <input type="checkbox"/> | <input type="checkbox"/> | <input type="checkbox"/> | <input type="checkbox"/> | <input type="checkbox"/> | <input type="checkbox"/> | <input type="checkbox"/> | <input type="checkbox"/> |
| <input type="checkbox"/> | <input type="checkbox"/> | Conjunctivitis                                                               | <input type="checkbox"/> | <input type="checkbox"/> | <input type="checkbox"/> | <input type="checkbox"/> | <input type="checkbox"/> | <input type="checkbox"/> | <input type="checkbox"/> | <input type="checkbox"/> | <input type="checkbox"/> |
| <input type="checkbox"/> | <input type="checkbox"/> | Urticaria                                                                    | <input type="checkbox"/> | <input type="checkbox"/> | <input type="checkbox"/> | <input type="checkbox"/> | <input type="checkbox"/> | <input type="checkbox"/> | <input type="checkbox"/> | <input type="checkbox"/> | <input type="checkbox"/> |
| <input type="checkbox"/> | <input type="checkbox"/> | Irritability (only for children)                                             | <input type="checkbox"/> | <input type="checkbox"/> | <input type="checkbox"/> | <input type="checkbox"/> | <input type="checkbox"/> | <input type="checkbox"/> | <input type="checkbox"/> | <input type="checkbox"/> | <input type="checkbox"/> |
| <input type="checkbox"/> | <input type="checkbox"/> | Persistent, inconsolable crying (only for children) minute/hours  _ _        | <input type="checkbox"/> | <input type="checkbox"/> | <input type="checkbox"/> | <input type="checkbox"/> | <input type="checkbox"/> | <input type="checkbox"/> | <input type="checkbox"/> | <input type="checkbox"/> | <input type="checkbox"/> |
| <input type="checkbox"/> | <input type="checkbox"/> | Other, please specify _____                                                  | <input type="checkbox"/> | <input type="checkbox"/> | <input type="checkbox"/> | <input type="checkbox"/> | <input type="checkbox"/> | <input type="checkbox"/> | <input type="checkbox"/> | <input type="checkbox"/> | <input type="checkbox"/> |

NOTE \_\_\_\_\_

\_\_\_\_\_

\_\_\_\_\_

\_\_\_\_\_



If the vaccinee reported at least one event, please specify:

Drug use for treatment of the event No  Yes

If yes, please specify what and when \_\_\_\_\_

\_\_\_\_\_

Medical visit No  Yes

If yes, please specify At home  Ambulatory  Hospital  Emergency department

Please specify the reason of the visit: \_\_\_\_\_

\_\_\_\_\_

Hospitalization No  Yes

If yes, please specify Admission date    Length of hospital stay (days)

Please specify the diagnosis of the hospital admission: \_\_\_\_\_

\_\_\_\_\_

Please specify the diagnosis of the hospital discharge: \_\_\_\_\_

\_\_\_\_\_

Event categories: Not serious  Serious  Not assessable

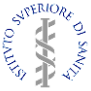

**SECTION 4: FOLLOW-UP AFTER 60 DAYS** (only for individuals with at least one event during the 7 day follow-up)

ID |\_|\_|\_|\_|\_|\_|\_|

Form completed by \_\_\_\_\_ Date \_\_\_\_\_

Vaccinee contacted? Yes  No

If vaccinee is lost to follow up, please specify the reason \_\_\_\_\_

If minor (under the age of 18 y):  Mother  Father  Other (please specify \_\_\_\_\_)

Administration  1° Dose  2° Dose

Vaccine brand \_\_\_\_\_ Date of administration |\_|\_| |\_|\_| |\_|\_|\_|\_|

**Health status after 60 days from the onset of the event**

General conditions Recovered without sequelae  Not yet recovered   
Recovered with sequelae  (Please specify \_\_\_\_\_)

Any other events within 60 days from the onset of the event Yes  No

If yes, please specify:

1. Date of onset of the event |\_|\_| |\_|\_| |\_|\_|\_|\_| Duration (days) |\_|\_|\_|

Brief description of the event \_\_\_\_\_  
\_\_\_\_\_  
\_\_\_\_\_

2. Date of onset of the event |\_|\_| |\_|\_| |\_|\_|\_|\_| Duration (days) |\_|\_|\_|

Brief description of the event \_\_\_\_\_  
\_\_\_\_\_  
\_\_\_\_\_

3. Date of onset of the event |\_|\_| |\_|\_| |\_|\_|\_|\_| Duration (days) |\_|\_|\_|

Brief description of the event \_\_\_\_\_  
\_\_\_\_\_  
\_\_\_\_\_

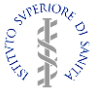

If the vaccinee reported at least one event, please specify:

Drug use for treatment of event No  Yes

If yes, please specify what and when \_\_\_\_\_

\_\_\_\_\_

Medical visit No  Yes

If yes, please specify At home  Ambulatory  Hospital  Emergency department

Please specify the reason of the visit: \_\_\_\_\_

\_\_\_\_\_

Hospitalization No  Yes

If yes, please specify Admission date    length of hospital stay (days)

Please specify the diagnosis of the hospital admission: \_\_\_\_\_

\_\_\_\_\_

Please specify the diagnosis of the hospital discharge: \_\_\_\_\_

\_\_\_\_\_
